# Supplementary material
Source: MDPI journal article supplement (https://www.mdpi.com/1996-1073/16/18/6740)
Supplement: s1 [file s1]

# Investigation on the Origin of Anionic Redox Sluggish Kinetics in Cation-Disordered Cathode

Qi Liang <sup>1</sup>, Peirong Li <sup>1</sup>, Yue Zhao <sup>1</sup>, Supeng Chen <sup>1</sup>, Jixiang Yin <sup>1</sup>, Yingchun Lyu<sup>2</sup>, Qiang Li <sup>1,\*</sup> and Qinghao Li <sup>1,\*</sup>

<sup>1</sup> College of Physics, Center for Marine Observation and Communications, Qingdao University, Qingdao 266071, China.

<sup>2</sup> Materials Genome Institute, Shanghai University, Shanghai 200444, China

\* Correspondence: [liqiang@qdu.edu.cn](mailto:liqiang@qdu.edu.cn) , [qhli@qdu.edu.cn](mailto:qhli@qdu.edu.cn)

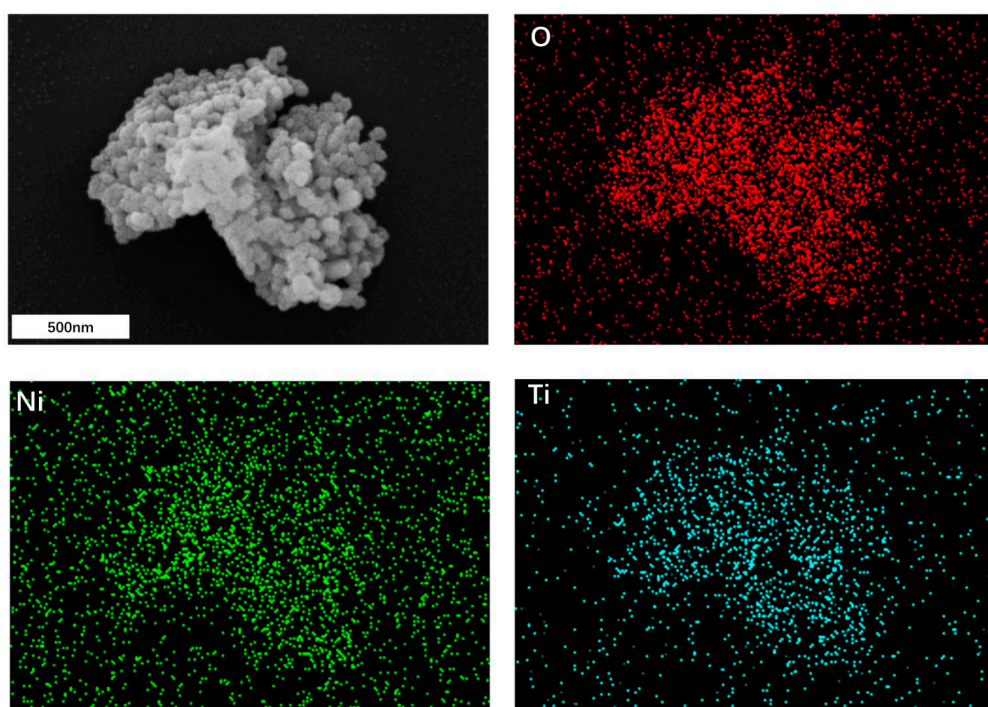

**Figure S1.** The Energy Dispersive X-Ray Spectroscopy (EDX) element diagram of LTNO cathode. The result shows the uniform distribution of Ti, Ni and O element signal in the prepared material.

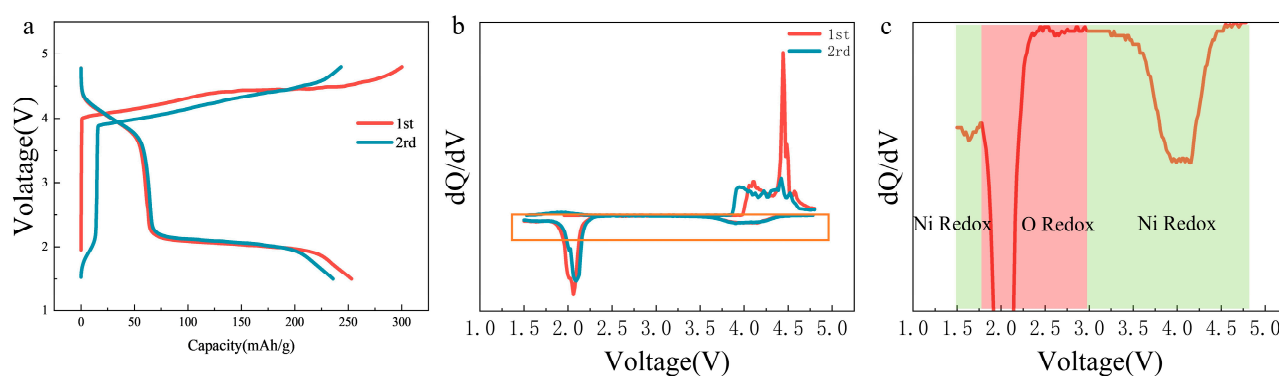

**Figure S2.** Electrochemical properties of  $\text{Li}_{1.17}\text{Ti}_{0.58}\text{Ni}_{0.25}\text{O}_2$ . (a) charge-discharge curves and (b)  $dQ/dV$  curves, the details of the orange area are shown in (c), the peaks at 4.0 V and 1.75 V are attributed to the redox of Ni (green shadow), and the peak at 2.0 V is attributed to the redox of O (red shadow)[1].

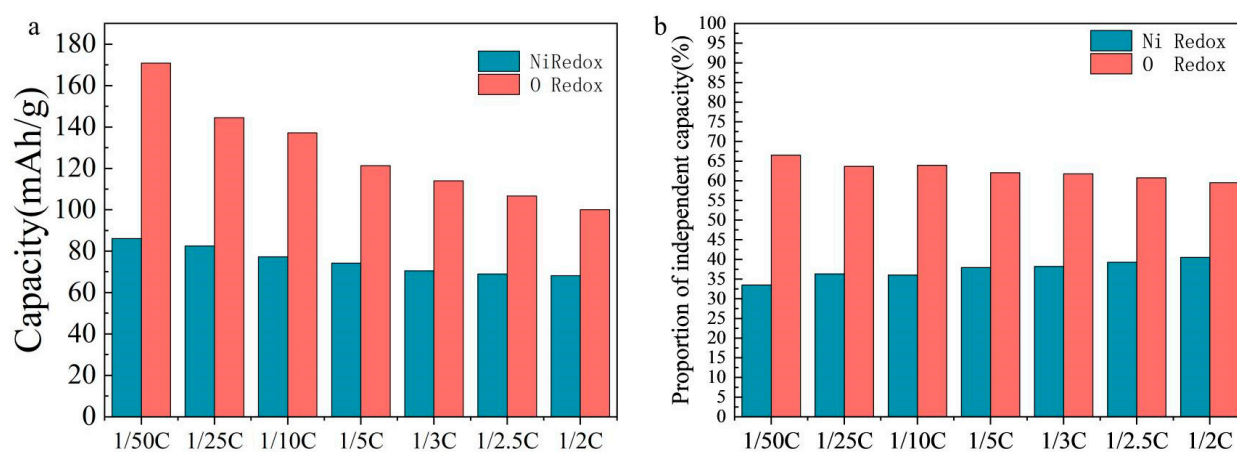

**Figure S3.** (a) The capacity of O and Ni at different rates and (b) their proportion in the total capacity. As the rate increases, the capacity released by O reduction (O Redox) decays more rapidly than the capacity released by Ni reduction (Ni Redox). At the same time, the proportion of O Redox in the total capacity gradually decreases, and the proportion of Ni Redox gradually increases.

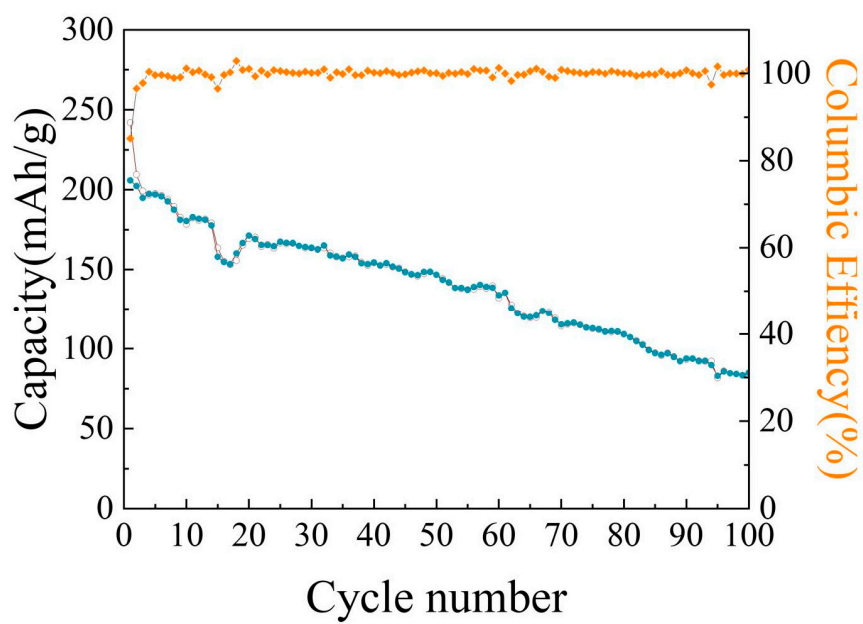

**Figure S4.** The cyclic performance of  $\text{Li}_{1.17}\text{Ti}_{0.58}\text{Ni}_{0.25}\text{O}_2$  at 0.5 C.

[1] J.M. Tarascon, Capturing dynamic ligand-to-metal charge transfer with a long-lived cationic intermediate for anionic redox, *Nat Mater*, 21 (2022) 1165-1174.
